## **Exercise mitigates sleep-loss-induced changes in glucose tolerance, mitochondrial function, sarcoplasmic protein synthesis, and circadian rhythms.**

Nicholas J Saner<sup>\*1,2</sup>, Matthew J-C Lee<sup>1</sup>, Jujiao Kuang<sup>1</sup>, Nathan W Pitchford<sup>1,3</sup>, Gregory D Roach<sup>4</sup>, Andrew Garnham<sup>1</sup>, Amanda J Genders<sup>1</sup>, Tanner Stokes<sup>5</sup>, Elizabeth A Schroder<sup>6</sup>, Karyn A Esser<sup>7</sup>, Stuart M Phillips<sup>5</sup>, David J Bishop<sup>\*1</sup>, Jonathan D Bartlett<sup>1</sup>.

<sup>1</sup> Institute for Health and Sport, Victoria University, Melbourne, Australia

<sup>2</sup> Sports Cardiology, Baker Heart and Diabetes Institute, Melbourne, Australia

<sup>3</sup> Sport Performance Optimisation Research Team, School of Human Life Sciences, University of Tasmania, Launceston, Australia.

<sup>4</sup> Appleton Institute for Behavioural Science, Central Queensland University, Adelaide, Australia.

<sup>5</sup> Department of Kinesiology, McMaster University, Hamilton, Canada

<sup>6</sup> Department of Physiology, College of Medicine, University of Kentucky, Lexington, United States

<sup>7</sup> Department of Physiology and Functional Genomics, University of Florida, Gainesville, United States.

**Running title:** Exercise mitigates detrimental metabolic effects caused by sleep restriction

**Keywords:** Sleep loss, high-intensity interval exercise, mitochondria, clock genes, glucose tolerance

### **\*Corresponding authors:**

Dr Nicholas J Saner and Prof. David Bishop

Institute for Health and Sport (IHES)

Footscray Park,

Ballarat Road,

Victoria University,

Melbourne, VIC,

Australia, 8001

Email: [nicholas.saner@live.vu.edu.au](mailto:nicholas.saner@live.vu.edu.au) and [david.bishop@vu.edu.au](mailto:david.bishop@vu.edu.au)

Tel: +61 418 376 762

1 **Abstract**

2 Sleep loss has emerged as a risk factor for the development of impaired glucose tolerance.  
3 The mechanisms underpinning this observation are unknown; however, both  
4 mitochondrial dysfunction and circadian misalignment have been proposed. Given that  
5 exercise improves glucose tolerance, mitochondrial function, and alters circadian  
6 rhythms, we investigated whether exercise may counteract the effects induced by  
7 inadequate sleep. We report that sleeping 4 hours per night, for five nights, reduced  
8 glucose tolerance, with novel observations of associated reductions in mitochondrial  
9 function, sarcoplasmic protein synthesis, and measures of circadian rhythmicity;  
10 however, incorporating three sessions of high-intensity interval exercise (HIIE) during  
11 this period mitigates these effects. These data demonstrate, for the first time, a sleep loss-  
12 induced concomitant reduction in a range of physiological processes linked to metabolic  
13 function. These same effects are not observed when exercise is performed during a period  
14 of inadequate sleep, supporting the use of HIIE as an intervention to mitigate the  
15 detrimental physiological effects of sleep loss.

## 16 **Introduction**

17 The detrimental effects of sleep loss on glucose tolerance are now well-established, and  
18 insufficient sleep is a risk factor for the development of type 2 diabetes (T2D) (1). In fact,  
19 sleep loss is comparable with other more traditional risk factors that are associated with  
20 the development of T2D, such as physical inactivity (1). Several studies have shown that  
21 periods of sleep restriction, or reduced time in bed (TIB), typically with a sleep  
22 opportunity of 4 to 5 h per night, cause significant reductions in a range of indices related  
23 to glucose metabolism (2-5). The severity of this effect can be seen with only one night  
24 of either sleep restriction (4 h TIB) or sleep deprivation (e.g., no sleep), which can reduce  
25 insulin sensitivity (6-9). Despite these findings, there are limited data explaining the  
26 physiological and molecular changes that underpin these effects. As a large proportion of  
27 the population do not meet the current sleep recommendations (e.g., 7 to 9 h, per night)  
28 (10, 11) and inadequate sleep is a consequence of many occupations (12, 13), gaining a  
29 better understanding of these mechanisms may help to tailor specific interventions aimed  
30 at counteracting the detrimental effects of sleep loss.

31

32 The physiological mechanisms that underpin the impairment of glucose tolerance  
33 following sleep restriction are likely multifactorial. While not previously investigated in  
34 the context of sleep loss, the development of insulin resistance has been associated with  
35 a reduction in mitochondrial content and impaired mitochondrial respiratory function (14,  
36 15). Furthermore, reductions in citrate synthase activity (a surrogate marker for  
37 mitochondrial content (16)) and mitochondrial respiratory function have also been  
38 reported in T2D patients, compared to obese non-diabetics, suggesting a link between  
39 mitochondrial changes and the development of insulin resistance and T2D (14, 15).  
40 Therefore, sleep-loss-induced reductions in glucose tolerance may, in part, be a  
41 consequence of changes in mitochondrial content, function, or the processes that regulate  
42 these properties - including mitochondrial dynamics and mitochondrial protein synthesis  
43 (17). In support of this, 120 h of sleep deprivation was associated with a 24% reduction  
44 in citrate synthase activity in human skeletal muscle (18). However, how these results  
45 translate to the context of the sleep loss commonly experienced in society, such as  
46 repeated nights of partial sleep loss, has not been determined and remains a critical gap  
47 in the literature.

48

49 The detrimental effect of sleep loss on glucose metabolism may also be associated with  
50 the misalignment of circadian rhythms (7, 8). One night of sleep deprivation (commonly  
51 experienced by 20% of the world's population who perform shift-work) leads to a  
52 reduction in glucose tolerance and concomitant alterations in the expression of skeletal  
53 muscle clock genes (i.e., *Bmal1* and *Cry1* gene expression (7)) and the content of clock  
54 proteins (i.e., BMAL1) (8), which are known to regulate circadian rhythms at a molecular  
55 level (19). The functional significance of disrupting the molecular clock has been shown  
56 in genetic mouse models (i.e., Clock mutant mice and the *Bmal1* KO mouse), which  
57 display reduced glucose tolerance, mitochondrial respiratory function, and skeletal  
58 muscle contractile function (20, 21). However, the effect of sleep restriction on markers  
59 of circadian rhythmicity (e.g., skeletal muscle clock gene expression) and the potential  
60 implications of such changes have not previously been examined.

61

62 One approach to mitigating or ablating the impact of reduced sleep duration on glucose  
63 tolerance is via exercise (17). Regular endurance exercise has been shown to exert  
64 beneficial effects on glycaemic control via the activation of the insulin-independent  
65 signalling pathway (22). High-intensity interval exercise (HIIE) is a time-efficient format  
66 of endurance exercise, and is also a potent stimulus for the induction of mitochondrial  
67 biogenesis (23), with increases in sarcoplasmic and mitochondrial protein synthesis, and  
68 mitochondrial content and respiratory function, occurring concomitantly with  
69 improvements in glucose tolerance (24-27). This raises the intriguing hypothesis that  
70 exercise may also be useful to combat sleep-loss-induced impairments to glucose  
71 tolerance, which are not necessarily reversed by a period of recovery sleep alone (28-30).  
72 Furthermore, the same detrimental metabolic changes that occur in response to circadian  
73 misalignment and altered expression of clock genes may also be ameliorated by  
74 performing exercise (20, 31, 32). Consequently, HIIE may be able to mitigate the  
75 detrimental effects of sleep loss on glucose metabolism, by increasing mitochondrial  
76 content and function, and preventing changes in circadian rhythmicity (17).

77

78 Accordingly, the aim of this study was to investigate the effect of sleep restriction on  
79 glucose tolerance, and to examine the underlying physiological alterations that might  
80 contribute to these changes; specifically, by examining changes in mitochondrial content  
81 and function, and circadian rhythmicity. Furthermore, we examined the role of exercise  
82 as an intervention to mitigate the detrimental effects of sleep restriction. We hypothesised

83 that sleep restriction would reduce mitochondrial content and respiratory function, and  
84 disrupt circadian rhythms, with a concomitant reduction in glucose tolerance, but that  
85 performance of HIIE would ameliorate these effects.

86

## 87 **Results**

### 88 **Sleep Data**

89 To verify the efficacy of our sleep interventions, we measured the participants' total sleep  
90 time (TST) via actigraphy (33). Mean nightly TST during the intervention was  
91 significantly lower for the SR (sleep restriction) and SR+EX (sleep restriction and  
92 exercise) groups compared to the NS (normal sleep) group ( $P < 0.05$ ) (see Table 1). There  
93 was no difference in nightly TST between the SR and SR+EX group. Polysomnography  
94 (PSG), considered the gold standard assessment of sleep (34), was used to confirm  
95 actigraphy TST data and to also assess sleep architecture on night 6 of the study ( $n = 4$  per  
96 group) (Supplementary Figure 1). Both the SR and SR+EX groups obtained significantly  
97 less time in rapid eye movement (REM) sleep, non-rapid eye movement (NREM) stage  
98 1 sleep, and NREM stage 2 sleep, compared to the NS group. Despite differences in TST  
99 between NS and both the SR and SR+EX groups, there were no significant differences in  
100 the absolute amount of sleep in the NREM stage 3 (N3) sleep between any of the groups  
101 (N3 sleep  $\pm$  SD, NS =  $72 \pm 17$ , SR =  $75 \pm 18$  min, SR+EX =  $71 \pm 14$  min,  $P > 0.05$ )  
102 (Supplementary Table 1). Thus, as reported previously (2), N3 sleep was preserved  
103 despite the reduced total sleep time.

104

105 **Table 1. Actigraphy sleep analysis and step counts for each group.**

|                                          | <b>NS</b>        | <b>SR</b>        | <b>SR+EX</b>     |
|------------------------------------------|------------------|------------------|------------------|
| <b>Sleep duration baseline (min)</b>     | 448 $\pm$ 25     | 452 $\pm$ 17     | 459 $\pm$ 9      |
| <b>Sleep duration intervention (min)</b> | 449 $\pm$ 22     | 230 $\pm$ 5*#    | 235 $\pm$ 5*#    |
| <b>Step count (habitual)</b>             | 12260 $\pm$ 3964 | 10965 $\pm$ 2136 | 11831 $\pm$ 919  |
| <b>Step count (intervention)</b>         | 10652 $\pm$ 2476 | 10033 $\pm$ 1839 | 10953 $\pm$ 2316 |

106 Values are mean  $\pm$  SD, Normal Sleep (NS), Sleep Restriction (SR) and Sleep Restriction  
107 + Exercise (SR+EX), baseline (mean of first two nights of the study), intervention (mean  
108 of 5 nights/days). \*  $P < 0.05$  compared to baseline within group, #  $P < 0.05$  compared to  
109 control (NS) during the intervention period.

110

### 111 **Wrist skin temperature analysis**

112 Next we used peripheral wrist skin temperature, obtained over two 48-h periods, pre- and  
113 post-intervention, to assess whether the significant reduction in TST in the SR and  
114 SR+EX groups altered aspects of circadian rhythmicity, as previously suggested (7, 8).

115 There was a significant effect of time ( $P=0.002$ ) for wrist skin temperature amplitude;  
116 the skin temperature amplitude in the SR group was significantly lower from pre- to post-  
117 intervention (mean amplitude change  $\pm$  SD  $^{\circ}\text{C}$ , 95% CI  $^{\circ}\text{C}$ ,  $P$  value;  $0.85 \pm 0.72^{\circ}\text{C}$ , CI  
118  $[0.20, 1.50^{\circ}\text{C}]$ ,  $P=0.008$ ), indicating a decreased robustness of the temperature circadian  
119 rhythm. There was no change in skin temperature amplitude in the NS ( $0.08 \pm 0.67^{\circ}\text{C}$ , CI  
120  $[-0.57, 0.73^{\circ}\text{C}]$ ,  $P=0.982$ ) or SR+EX ( $0.66 \pm 0.65^{\circ}\text{C}$ , CI  $[-0.08, 1.43^{\circ}\text{C}]$ ,  $P=0.091$ ) groups  
121 (Figure 1). Furthermore, there was a significant effect of time ( $P<0.001$ ) for wrist skin  
122 temperature stability, with a significant reduction in the SR+EX group ( $53.2 \pm 48.0$  -ln,  
123 CI  $[13.7, 92.7$  -ln],  $P=0.006$ ), but not the NS ( $15.1 \pm 39.3$  -ln, CI  $[-21.9, 52.039$  -ln],  
124  $P=0.658$ ) or SR ( $30.5 \pm 30.9$  -ln, CI  $[-6.4, 67.5$  -ln],  $P=0.126$ ) groups from pre- to post-  
125 intervention.  
126

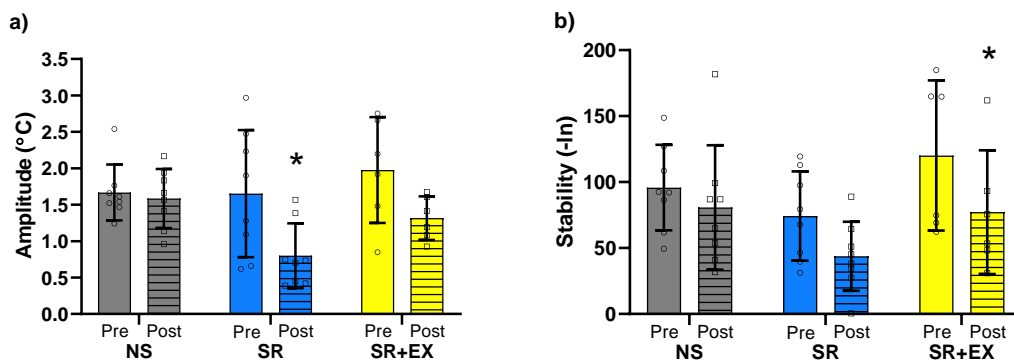

127 **Figure 1 - Measure of circadian peripheral skin temperature a) amplitude and b)**  
128 **stability pre- and post-intervention.** Pre-intervention measurements are Day 2 and 3  
129 (until 23:00 h) and the post-intervention measurements are Day 6 and Day 7. Normal  
130 Sleep (NS,  $n=8$ ), Sleep Restriction (SR,  $n=8$ ) and Sleep Restriction and Exercise  
131 (SR+EX,  $n=6$ ). \*Denotes significant within-group differences from pre- to post-  
132 intervention ( $P<0.05$ ).  
133  
134

### 135 Glucose tolerance

136 As both sleep loss and disturbances to circadian rhythm have been associated with  
137 impaired glucose tolerance, we examined plasma glucose and insulin concentrations in  
138 response to an oral glucose tolerance test (OGTT), performed before and after the sleep  
139 interventions. There were no significant differences between groups for pre-intervention  
140 glucose ( $P=0.771$ ) and insulin ( $P=0.137$ ) area under the curve (AUC) values. Post-  
141 intervention, there was a significant increase for total glucose AUC in the SR group (mean  
142 change  $\pm$  SD, 95% CI,  $P$  value;  $149 \pm 115$  A.U., CI  $[54, 243$  A.U.],  $P=0.002$ ) but not the  
143 NS group ( $-59 \pm 122$  A.U., CI  $[-36, 154$  A.U.],  $P=0.356$ ) or the SR+EX group ( $67 \pm 57$ ,

144 CI [-162 to 28 A.U.],  $P=0.239$ ). Although there was no interaction for changes in insulin  
145 AUC for any group pre- to post-intervention ( $P=0.085$ ), there was a 29% increase in  
146 insulin AUC following the SR intervention (NS:  $-581 \pm 1797$  A.U., CI [-2037, 874 A.U.],  
147  $P=0.933$ ; SR:  $1275 \pm 1787$  A.U., CI [-180, 2731 A.U.],  $P=0.100$  and SR+EX:  $518 \pm$   
148  $1043$  A.U., CI [-937, 1975 A.U.],  $P>0.999$ ) (Figure 2 and Supplementary Tables 2 and  
149 3).  
150

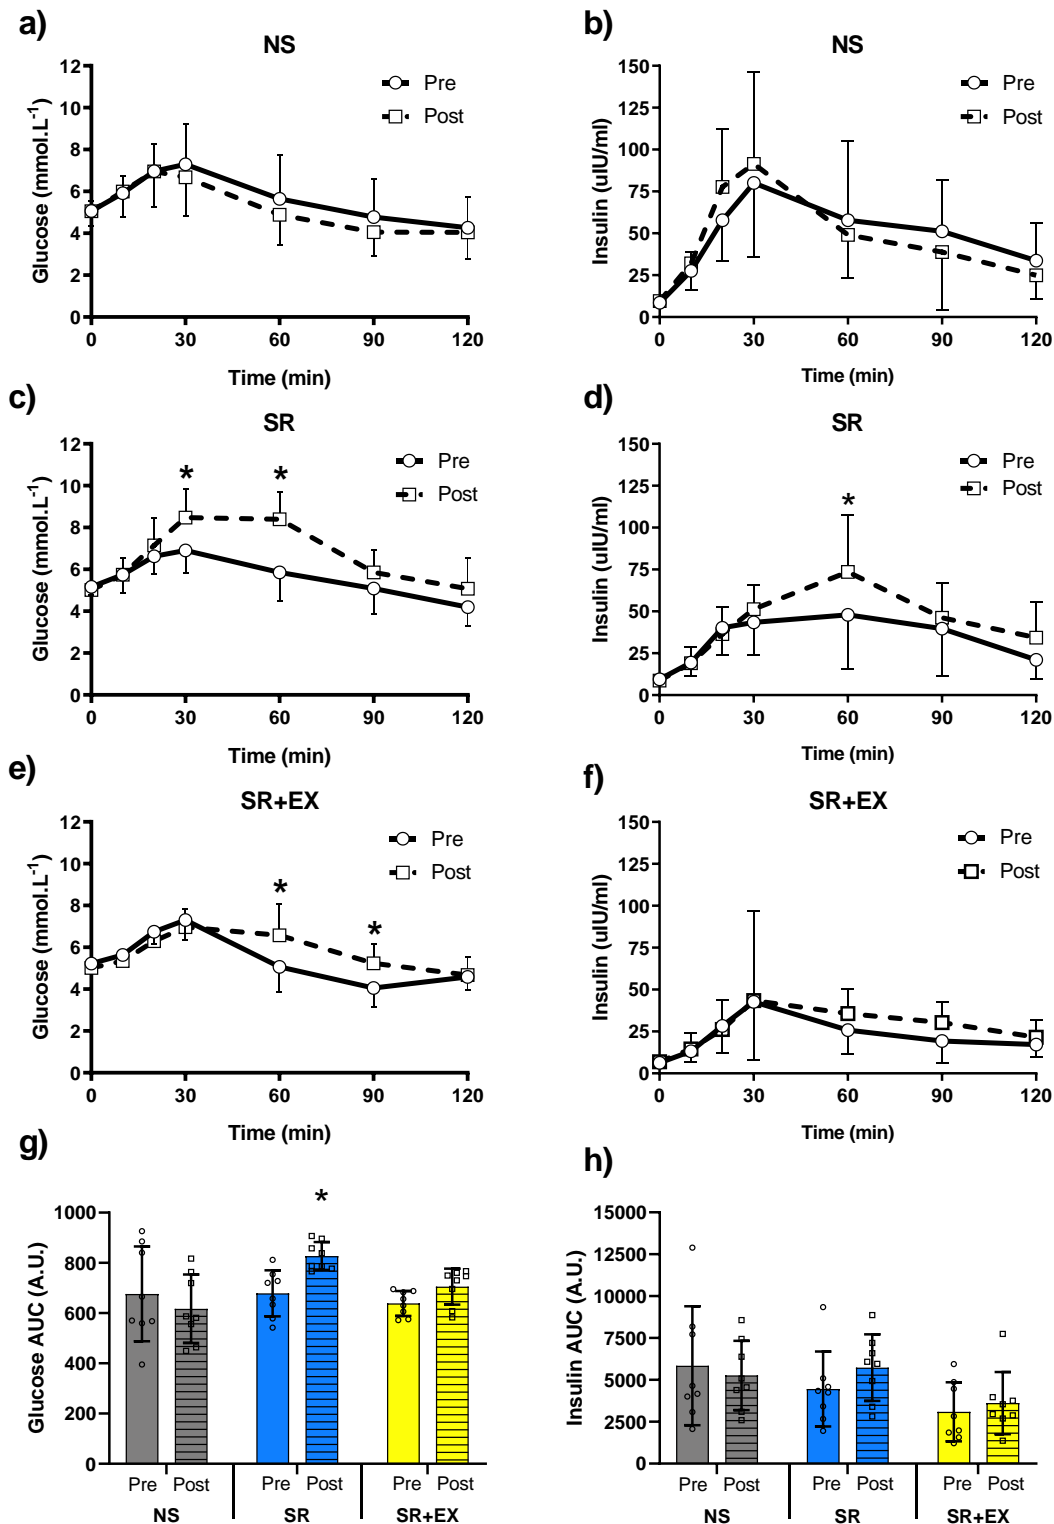

151  
152  
153  
154  
155  
156  
157  
158

**Figure 2 – Plasma glucose and insulin concentrations for pre- and post-intervention oral glucose tolerance tests (OGTT).** Plasma glucose and insulin concentrations throughout the 120-minute OGTT in the (a, b) Normal Sleep (NS), (c, d) Sleep Restriction (SR), and (e, f) Sleep Restriction and Exercise (SR+EX) groups. g) Glucose and h) Insulin total area under the curve (AUC) during the OGTT. Values are mean  $\pm$  SD, individual data points are shown, \* Denotes significant within-group differences from pre- to post-intervention ( $P < 0.05$ ).  $n = 8$  per group.



159 **Mitochondrial content, function, and protein synthesis**

160 As both insulin resistance and reduced glucose tolerance have been linked to changes in  
161 mitochondrial characteristics, we investigated if skeletal muscle mitochondrial  
162 respiratory function, content, and protein synthesis (via sarcoplasmic protein synthesis)  
163 were influenced by the sleep loss and exercise interventions. There was a significant  
164 interaction effect for maximal coupled mitochondrial respiration (ETF+CI+CII)<sub>P</sub>  
165 ( $P=0.032$ ), which revealed a reduction from pre- to post-intervention (mean change  $\pm$  SD  
166 pmol O<sub>2</sub>.s<sup>-1</sup>.mg<sup>-1</sup>, 95% CI,  $P$  value) in the SR group ( $-15.9 \pm 12.4$  pmol O<sub>2</sub>.s<sup>-1</sup>.mg<sup>-1</sup>, CI [-  
167 25.6, -6.1 pmol O<sub>2</sub>.s<sup>-1</sup>.mg<sup>-1</sup>],  $P=0.001$ ) (~18% decrease and a coefficient of variation (CV)  
168 of ~12%) (Figure 3a). This was not evident in the NS ( $8.1 \pm 6.9$  pmol O<sub>2</sub>.s<sup>-1</sup>.mg<sup>-1</sup>, CI [-1.6  
169 to 17.9 pmol O<sub>2</sub>.s<sup>-1</sup>.mg<sup>-1</sup>],  $P=0.122$ ) or SR+EX groups ( $0.6 \pm 11.8$  pmol O<sub>2</sub>.s<sup>-1</sup>.mg<sup>-1</sup>, CI [-  
170 9.1, 10.4 pmol O<sub>2</sub>.s<sup>-1</sup>.mg<sup>-1</sup>],  $P=0.997$ ) (Figure 3b and 3c). These results show for the first  
171 time that sleep loss is associated with decreased mitochondrial respiratory function, which  
172 was mitigated by exercise.

173

174 Mitochondrial content can be assessed via CS activity and the protein content of  
175 mitochondrial complex subunits (16). There were no changes in whole-muscle CS  
176 activity from pre- to post-intervention for any of the groups (interaction,  $P=0.972$ ) (mean  
177 difference, 95% CI,  $P$  value, NS  $0.10 \pm 0.45$  mol/h/kg protein, CI [-0.24, 0.44 mol/h/kg  
178 protein],  $P>0.999$ ); (SR  $0.13 \pm 0.29$  mol/h/kg protein, CI [-0.21, 0.47 mol/h/kg protein],  
179  $P=0.992$ ) and (SR+EX  $0.08, \pm 0.35$  mol/h/kg protein, CI [-0.26, 0.43 mol/h/kg protein],  
180  $P>0.999$ ) (Figure 3d). As a further validation of changes in mitochondrial content, the  
181 protein content for subunits of mitochondrial complexes were assessed via western  
182 blotting. No significant interaction effects were observed for the protein content of  
183 Complex 1 ( $P=0.116$ ), Complex 2 ( $P=0.649$ ), Complex 3 ( $P=0.621$ ), Complex 4  
184 ( $P=0.718$ ) or Complex 5 ( $P=0.158$ ) (Figure 3e), collectively indicating that the sleep and  
185 exercise interventions did not affect mitochondrial content.

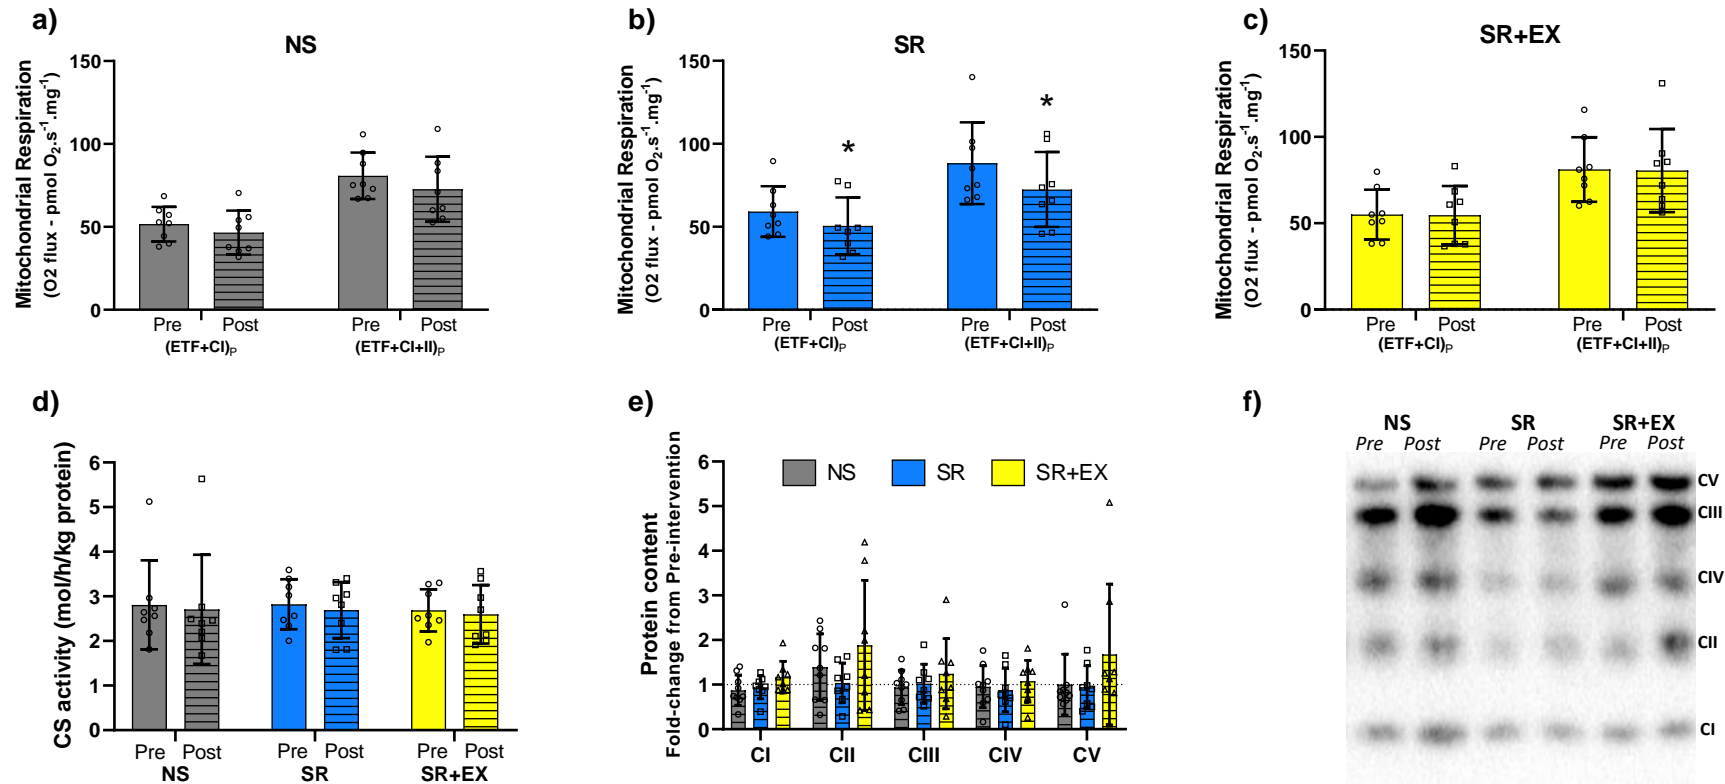

187

188

189

190

191

192

193

194

195

**Figure 3- Mitochondrial respiratory function and markers of mitochondrial content from pre-intervention compared to post-intervention.**

Mitochondrial respiratory function in the (a) Normal Sleep (NS), (b) Sleep Restriction (SR) and (c) Sleep Restriction and Exercise (SR+EX) groups. (d) Citrate synthase activity and (e) fold-change of protein content for subunits of mitochondrial complexes (I – V) from pre- to post-intervention. Mitochondrial complex 1 (CI) - NDUFB8, Complex 2 (CII) - SDHB, Complex 3 (CIII) - Core protein 2 (UQCCRC2), Complex 4 (CIV) – MTCO, Complex 5 (CV) – ATP5A. (f) Representative image of protein content for mitochondrial complexes. Normal Sleep (NS), Sleep Restriction (SR) and Sleep Restriction + Exercise (SR+EX), (ETF+CI)<sub>P</sub> – maximal coupled mitochondrial respiration through electron transfer flavoprotein (ETF) and CI; (ETF+CI+CII)<sub>P</sub> – maximal coupled mitochondrial respiration through ETF, CI and CII; Pre – pre-intervention, Post – post-intervention. *n*=8 per group. \* Denotes significant difference within group from pre- to post-intervention (*p*<0.05).

196 It has been argued that the best measure of mitochondrial biogenesis is mitochondrial  
197 protein synthesis (MitoPS) (35). The sarcoplasm (skeletal muscle cytoplasm) is enriched  
198 with mitochondria (see Figure 4a), and protein synthesis within this fraction  
199 (sarcoplasmic protein synthesis - SarcPS) is likely reflective of MitoPS (24). Therefore  
200 we assessed, for the first time, the effects of sleep restriction on SarcPS, which was  
201 significantly lower in the SR group compared to both the NS group (between groups  
202 difference FSR %/day  $\pm$  SD, 95% CI,  $P$  value,  $-0.62 \pm 0.11\%$ , CI  $[-0.90, -0.33]$ ,  $P < 0.001$ )  
203 and the SR+EX group ( $-0.66 \pm 0.12\%$ , CI  $[-0.95, -0.37]$ ,  $P < 0.001$ ); there was no  
204 difference in SarcPS between the NS and SR+EX groups ( $0.04 \pm 0.10\%$ , CI  $[-0.33, 0.24]$ ,  
205  $P > 0.999$ ) (Figure 4b). These new data suggest that exercise can mitigate the lower rates  
206 of SarcPS seen following sleep restriction alone.

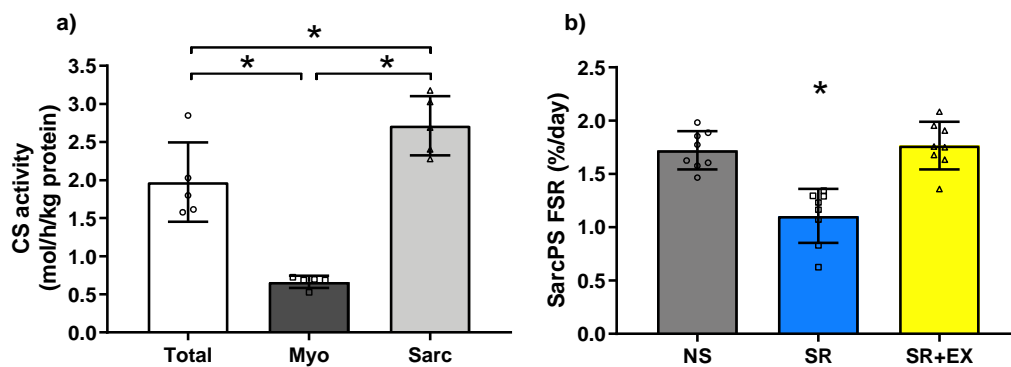

207

208 **Figure 4 - Citrate synthase (CS) activity from fractionated skeletal muscle samples**  
209 **and Sarcoplasmic protein synthesis (SarcPS) – a) CS activity of whole-muscle lysate**  
210 **(Total), myofibrillar (Myo), and sarcoplasmic (Sarc) fractions were assessed from the**  
211 **same muscle samples ( $n=5$ ). b) Fractional synthetic rate (FSR) of SarcPS during the sleep**  
212 **intervention. Data are mean  $\pm$  SD. Normal Sleep (NS), Sleep Restriction (SR), and Sleep**  
213 **Restriction + Exercise (SR+EX),  $n=8$  per group. \*denotes significantly different from**  
214 **other groups ( $P < 0.05$ ).**

215

## 216 **Glucose, circadian, and mitochondrial-related gene expression**

217 Given the changes observed for mitochondrial respiration, protein synthesis, circadian  
218 rhythm (reflected by peripheral skin temperature), and glucose tolerance, we investigated  
219 the expression of genes that regulate these processes (Table 2). In the SR group, there  
220 was a significant reduction from pre- to post-intervention in the mRNA of *Mfn2* (mean  
221 change  $\pm$  SD %, 95 % CI,  $P$  value;  $-35 \pm 28$  %, CI  $[-7, 79$  %],  $P=0.044$ ), *Bmal1* ( $-29 \pm$   
222  $33\%$ , CI  $[-6, 64\%]$   $P=0.031$ ), and *Glut4* ( $-38 \pm 33\%$ , CI  $[-13, 88\%]$ ,  $P=0.020$ ), which  
223 were not evident in the NS or SR+EX groups. There was also a decrease in *Tfam* and

224  $\beta$ -*Had* mRNA expression with time; however, post-hoc analysis revealed no specific  
225 group differences from pre- to post-intervention.

226

## 227 **Glucose, circadian, and mitochondrial-related protein content**

228 Following our discovery of reductions in the mRNA of some mitochondrial, circadian,  
229 and glucose-related genes, we used the limited amount of remaining muscle biopsy tissue  
230 to assess whether this leads to further changes at the protein level. There were no  
231 significant interaction effects for PGC-1 $\alpha$  ( $P=0.257$ ), DRP1 ( $P=0.642$ ), MFN2  
232 ( $P=0.768$ ), p53 ( $P=0.294$ ), BMAL1 ( $P=0.778$ ), or GLUT4 ( $P=0.466$ ) protein content,  
233 from pre- to post-intervention (Figure 5).

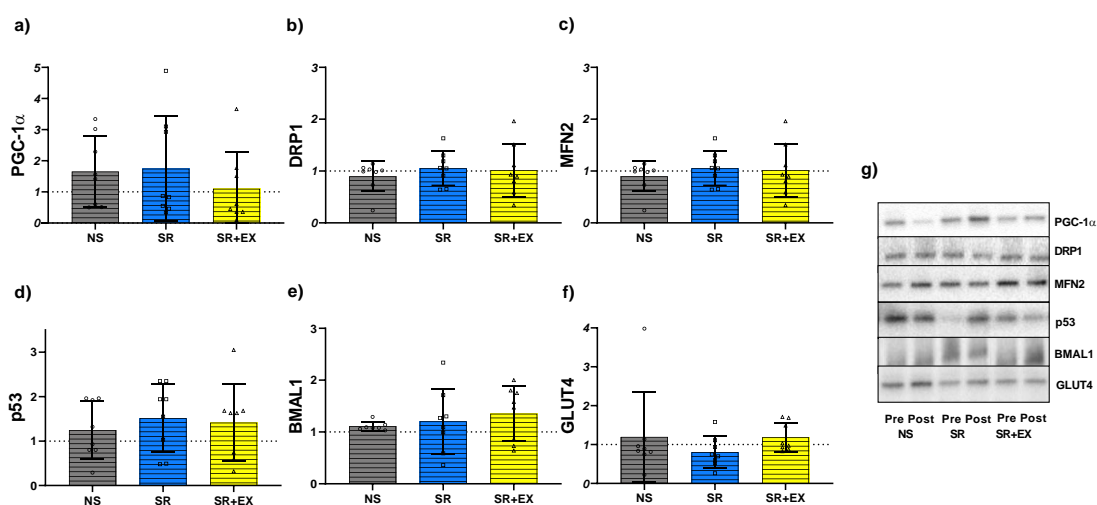

234

235 **Figure 5 - Skeletal muscle mitochondrial, circadian, and glucose-related protein**  
236 **content** a) PGC-1 $\alpha$ , b) DRP1, c) MFN2, d) p53, e) BMAL1, f) GLUT4, and g)  
237 representative western blot images. Data are mean values  $\pm$  SD, normalised to pre-  
238 pre-intervention values. Normal Sleep (NS), Sleep Restriction (SR) and Sleep Restriction and  
239 Exercise (SR+EX),  $n=8$  per group. \* Denotes significant change from pre-intervention  
240 ( $P < 0.05$ ).

241

242

243

244

245

246

247

248

249

250

251

252

253

254

255  
256  
257

**Table 2 – Glucose, circadian, and mitochondrial-related skeletal muscle mRNA responses**

| Name                                          | NS       | SR               | SR+EX    | Interaction effect | Time effect           |
|-----------------------------------------------|----------|------------------|----------|--------------------|-----------------------|
| <b><i>Glucose metabolism related mRNA</i></b> |          |                  |          |                    |                       |
| <i>Glut4</i>                                  | -14 ± 18 | <b>-38 ± 33*</b> | 16 ± 83  | <i>P</i> =0.192    | <b><i>P</i>=0.022</b> |
| <i>Ampk1α</i>                                 | -17 ± 30 | -1 ± 52          | -15 ± 24 | <i>P</i> =0.952    | <i>P</i> =0.060       |
| <i>Pdk4</i>                                   | 0 ± 105  | 124 ± 286        | 60 ± 111 | <i>P</i> =0.862    | <i>P</i> =0.850       |
| <i>β-Had</i>                                  | -30 ± 42 | -25 ± 39         | -15 ± 42 | <i>P</i> =0.872    | <b><i>P</i>=0.011</b> |
| <b><i>Circadian related mRNA</i></b>          |          |                  |          |                    |                       |
| <i>Bmal1</i>                                  | 2 ± 22   | <b>-29 ± 33*</b> | 7 ± 51   | <i>P</i> =0.154    | <b><i>P</i>=0.041</b> |
| <i>Clock</i>                                  | 6 ± 75   | -7 ± 45          | -14 ± 37 | <i>P</i> =0.775    | <i>P</i> =0.407       |
| <i>Per1</i>                                   | -7 ± 44  | -28 ± 48         | 2 ± 71   | <i>P</i> =0.527    | <i>P</i> =0.123       |
| <i>Per2</i>                                   | -4 ± 32  | -7 ± 51          | -6 ± 48  | <i>P</i> =0.719    | <i>P</i> =0.410       |
| <i>Cry1</i>                                   | 7 ± 45   | 12 ± 34          | -10 ± 21 | <i>P</i> =0.466    | <i>P</i> =0.982       |
| <i>Rev-Erb α</i>                              | -9 ± 38  | -9 ± 47          | -20 ± 42 | <i>P</i> =0.583    | <i>P</i> =0.130       |
| <b><i>Mitochondrial related mRNA</i></b>      |          |                  |          |                    |                       |
| <i>Pgc1α total</i>                            | -33 ± 51 | -23 ± 49         | 14 ± 61  | <i>P</i> =0.552    | <i>P</i> =0.076       |
| <i>p53</i>                                    | 48 ± 58  | 89 ± 100         | 6 ± 41   | <i>P</i> =0.523    | <i>P</i> =0.067       |
| <i>Tfam</i>                                   | -20 ± 33 | -22 ± 41         | -7 ± 59  | <i>P</i> =0.816    | <b><i>P</i>=0.035</b> |
| <i>Nrf2</i>                                   | -1 ± 34  | -11 ± 33         | -4 ± 43  | <i>P</i> =0.777    | <i>P</i> =0.179       |
| <i>Dnm1l</i>                                  | -14 ± 45 | -3 ± 65          | -4 ± 72  | <i>P</i> =0.937    | <i>P</i> =0.170       |
| <i>Mfn1</i>                                   | 6 ± 39   | -12 ± 47         | -5 ± 53  | <i>P</i> =0.414    | <i>P</i> =0.524       |
| <i>Mfn2</i>                                   | 18 ± 28  | <b>-35 ± 28*</b> | 2 ± 68   | <i>P</i> =0.562    | <b><i>P</i>=0.002</b> |
| <i>Lc3b</i>                                   | 4 ± 50   | -16 ± 40         | -11 ± 55 | <i>P</i> =0.486    | <i>P</i> =0.177       |
| <i>p62/SQSTM1</i>                             | 39 ± 75  | -1 ± 39          | -8 ± 69  | <i>P</i> =0.088    | <i>P</i> =0.628       |
| <i>Pink1</i>                                  | -21 ± 34 | -32 ± 45         | 2 ± 74   | <i>P</i> =0.895    | <i>P</i> =0.204       |
| <i>Cox4</i>                                   | -11 ± 22 | -23 ± 28         | -3 ± 65  | <i>P</i> =0.537    | <i>P</i> =0.088       |

258 Values are mean ± SD percent (%) changes from pre-intervention mRNA values. Normal  
259 Sleep (NS, *n*=7), Sleep Restriction (SR, *n*=8), and Sleep Restriction and Exercise  
260 (SR+EX, *n*=8). \*Significantly different from pre-intervention value (*P*<0.05).

261  
262  
263  
264

## 265 **Discussion**

266 We discovered that in healthy young men, sleep restriction resulted in significantly  
267 impaired glucose tolerance, with concomitant changes in circadian rhythmicity (skin  
268 temperature amplitude and clock gene expression), skeletal muscle mitochondrial  
269 respiratory function, and sarcoplasmic protein synthesis (SarcPS) – a proxy for  
270 mitochondrial protein synthesis. However, performing three sessions of high-intensity  
271 interval exercise (HIIE) during the sleep restriction intervention mitigated the  
272 perturbations that were observed in the SR group. Mechanistically, there were also  
273 differences between the SR and SR+EX groups in the expression and content of essential  
274 glucose and mitochondrial-related regulatory markers. Our study provides novel insights  
275 into the potential mechanisms underlying previously reported changes in glucose  
276 tolerance with sleep loss and suggests exercise may be used as a therapeutic intervention  
277 to attenuate such adverse effects.

278

279 The sleep restriction protocol used in this study (consisting of 4 h TIB per night, for five  
280 consecutive nights) resulted in a significant impairment in glucose tolerance.  
281 Furthermore, the plasma insulin response during the OGTT for the SR group increased  
282 by 29% from pre- to post-intervention. These results are consistent with previous studies  
283 (3-5), including Rao et al. (2) who reported a 25% decrease in whole-body insulin  
284 sensitivity (measured with a hyperinsulinaemic-euglycaemic clamp) following a similar  
285 sleep restriction protocol (2). Therefore, the 22% increase in plasma glucose AUC  
286 following sleep restriction observed in young, healthy men in this study solidifies the  
287 evidence supporting the detrimental effect of even short periods of sleep restriction on  
288 glucose tolerance.

289

290 A novel aspect of this study was to examine the effect of three sessions of HIIE during  
291 the period of sleep restriction as a means of mitigating sleep restriction-induced  
292 reductions in glucose tolerance. In contrast to the SR group, adverse changes in glucose  
293 tolerance were mitigated in the SR+EX group. While others have shown acute positive  
294 (36) and protective (37) effects of exercise on sleep-loss-induced changes in glucose  
295 tolerance, these studies assessed glucose tolerance either immediately after or within 24  
296 h of exercise, raising the possibility these findings were confounded by the acute effects  
297 of exercise on glycaemic control, which are known to persist for up to 48 h (22). In  
298 contrast, we performed the OGTT 48 h post exercise, thus demonstrating for the first time

299 that performing HIIE during a period of sleep restriction prevents the negative effects to  
300 glucose tolerance.

301

302 The changes in glucose tolerance were mirrored by changes in skeletal muscle glucose  
303 transporter 4 (*Glut4*) mRNA expression, whereby *Glut4* was lower in the SR group but  
304 maintained in the SR+EX group. The maintenance of *Glut4* expression in the SR+EX  
305 group is likely explained by the well-documented increase in expression commonly  
306 observed with exercise (38). While there were no changes in GLUT4 protein content in  
307 our study, a previous study that used streptozocin-induced diabetic rats demonstrates that  
308 changes in skeletal muscle *Glut4* mRNA coincide with reductions in *in-vivo* glucose  
309 uptake, but precede changes in GLUT4 protein content (39). Given that there was no  
310 change in GLUT4 protein content in these previous studies, it may suggest that GLUT4  
311 translocation may be impaired and supports previous research indicating impairments  
312 within the insulin signalling pathway, following sleep restriction (40, 41).

313

314 Insulin resistance and reductions in glucose tolerance have previously been linked to  
315 altered mitochondrial characteristics (14, 15); therefore, we also assessed changes in  
316 skeletal muscle mitochondrial respiratory function. To our knowledge, ours is the first  
317 report of a SR-induced reduction in skeletal muscle mitochondrial respiratory function in  
318 humans. Previously, a study in humans investigating a single night of 4 h TIB reported a  
319 decrease in insulin sensitivity with a concomitant increase in plasma acylcarnitines (9),  
320 which was suggested to be indicative of both reduced fatty acid oxidation and impaired  
321 mitochondrial function. The maintenance of mitochondrial respiratory function in the  
322 SR+EX group is consistent with previous reports of the potency of HIIE for improving  
323 mitochondrial respiratory function (26, 42); however, we admittedly do not have a  
324 Normal Sleep and HIIE group that would allow us to ascertain whether HIIE enhanced  
325 mitochondrial function. Nonetheless, our results do provide evidence supportive of a link  
326 between reduced mitochondrial respiratory function and impaired glucose tolerance with  
327 sleep restriction that is mitigated by the addition of HIIE.

328

329 Mitochondria are dynamic organelles and the production of new mitochondrial proteins  
330 is an important determinant of their overall function (35). Mitochondrial protein synthesis  
331 (MitoPS) is the measure that best reflects the process of mitochondrial biogenesis (23,  
332 35). However, tissue availability for this project necessitated the use of sarcoplasmic

333 protein synthetic rate (e.g., SarcPS – Figure 4a) as a proxy for MitoPS. For the first time,  
334 we report a lower rate of SarcPS in the SR group compared to both the NS and SR+EX  
335 groups (Figure 4b). The significance of the lower rate of SarcPS in the SR group is  
336 difficult to ascertain; however, we hypothesise it may underpin a reduced turnover of  
337 mitochondrial proteins, with a subsequent impact on mitochondrial respiratory function  
338 (35). Support for this notion comes from the observation that changes in MitoPS and  
339 mitochondrial respiratory function have been shown to occur concomitantly (23, 43);  
340 nonetheless, a direct link is yet to be established. Moreover, HIIE has consistently been  
341 reported to increase both SarcPS and MitoPS (24, 44), and this likely accounts for the  
342 higher rate of SarcPS in the SR+EX group compared to the SR group. Indeed, previous  
343 reports indicate that SarcPS remains elevated for 48 h following endurance exercise (45),  
344 and these increases are likely reflected in the integrative measure of protein synthesis  
345 used in this study, which represents a summation of SarcPS throughout the entire  
346 intervention.

347

348 Considering the changes observed to SarcPS, the effect of sleep restriction on markers of  
349 mitochondrial content was also assessed. There were no changes to the protein content of  
350 mitochondrial complex subunits or CS activity – both of which are valid markers of  
351 mitochondrial content (16). While reduced CS activity has previously been reported  
352 following sleep interventions, this was in response to extreme sleep deprivation (i.e., 120  
353 h of continuous wakefulness) (18); thus, a direct comparison with our findings is difficult.  
354 Despite no change in CS activity or protein content of mitochondrial complex subunits in  
355 the SR+EX group, endurance exercise is well known to increase mitochondrial content  
356 (25). Our results suggest changes in mitochondrial respiratory function and SarcPS  
357 occurred independently of detectable changes in mitochondrial content. This dissociation  
358 between changes in mitochondrial content and respiratory function has previously been  
359 reported, and it has been suggested that these properties may be differentially regulated  
360 (26, 43). One explanation for our observations may involve the processes regulating  
361 mitochondrial dynamics/remodelling (i.e., fission and fusion), which can alter the  
362 efficiency and oxidative capacity of the mitochondria, without necessarily altering  
363 mitochondrial content (23). Therefore, we assessed genes and proteins known to regulate  
364 mitochondrial remodelling. The reduced Mitofusin 2 (*Mfn2*) gene expression in this study  
365 points to a potential link between altered mitochondrial morphology and the reduced  
366 mitochondrial respiratory function and glucose tolerance observed in the SR group.



367 Considering exercise can also influence mitochondrial dynamics and mitophagy (46, 47),  
368 and that *Mfn2* has previously been shown to be elevated in skeletal muscle 24 h post an  
369 endurance exercise session (48), this may explain why *Mfn2* mRNA levels were  
370 maintained in the SR+EX group.

371

372 As many of the molecular processes that regulate mitochondrial content, function, and  
373 dynamics are regulated in a circadian manner (49, 50), we also examined aspects of  
374 circadian rhythmicity using the robust measures of peripheral skin temperature (obtained  
375 over 48 h, pre- and post-intervention) and analysis of molecular clock gene expression.  
376 Peripheral skin temperature measures oscillate inversely to the rhythms of core body  
377 temperature and therefore provides a physiological circadian output. We show that skin  
378 temperature amplitude, a common measure of assessing the circadian nature of biological  
379 processes, was significantly reduced in the SR group. Our data parallels that of Moller-  
380 Levet et al. (51) who reported in human white blood cells, reduced amplitude of core  
381 clock gene circadian expression following seven nights of sleep restriction (6 h TIB each  
382 night). At the skeletal muscle level, we also show a significant reduction in *Bmal1* mRNA  
383 from pre- to post-intervention in the SR group, but not in the NS or SR+EX groups. This  
384 supports previous findings from Cedernaes et al. (7, 8) who reported a decrease in *Bmal1*  
385 mRNA expression following 24 h of sleep deprivation. Moreover, reductions in *Glut4*  
386 mRNA expression, similar to those we report in the SR group, have also been reported in  
387 *Bmal1*<sup>-/-</sup> mice (52), suggesting the reductions in *Bmal1* mRNA and changes to circadian  
388 rhythm that were observed in the SR group may contribute to changes in *Glut4* mRNA.  
389 These findings suggest that sleep restriction can disrupt the skeletal muscle circadian  
390 clock, which has been associated with negative metabolic consequences, such as insulin  
391 resistance and mitochondrial function (21, 52).

392

393 Exercise is considered a potent zeitgeber (i.e., circadian time cue) capable of altering  
394 circadian rhythms (31, 53), therefore, we examined its effect on skin temperature and  
395 clock gene expression. In this study, there was a reduction in skin temperature stability,  
396 whilst skeletal muscle *Bmal1* mRNA expression was maintained in the SR+EX group,  
397 but not the SR group. Exercise-like contractile activity in C2C12 myotubes induce time  
398 of day related-phase shifts in *Bmal1* mRNA expression (53), which may help to explain  
399 our findings. Nevertheless, further studies and additional muscle sampling time-points  
400 are needed to clarify the effect of exercise performed at different times of the day in

401 humans, as well as changes in the underlying regulatory mechanisms (i.e., clock gene  
402 expression). This will further optimise the implementation of exercise strategies to realign  
403 changes in circadian rhythms induced by inadequate sleep.

404

405 In summary, we have provided the first direct evidence of a concomitant decrease in  
406 mitochondrial respiratory function, SarcPS (of which MitoPS is a contributor), and  
407 glucose tolerance, following sleep restriction in otherwise healthy young men. We  
408 discovered alterations in mRNA expression of select genes involved in glucose uptake,  
409 mitochondrial dynamics, and circadian rhythms (Figure 6). Collectively, these results  
410 highlight a number of potential mechanisms by which sleep restriction may lead to  
411 reductions in glucose tolerance. Importantly, HIIE mitigated these detrimental changes in  
412 glucose tolerance and mitochondrial characteristics. While further research is still  
413 required, these data provide a basis for the development of evidence-based health  
414 guidelines and recommendations for those experiencing inadequate sleep, by highlighting  
415 some of the underlying biological mechanisms that can be targeted by therapeutic  
416 interventions such as exercise.

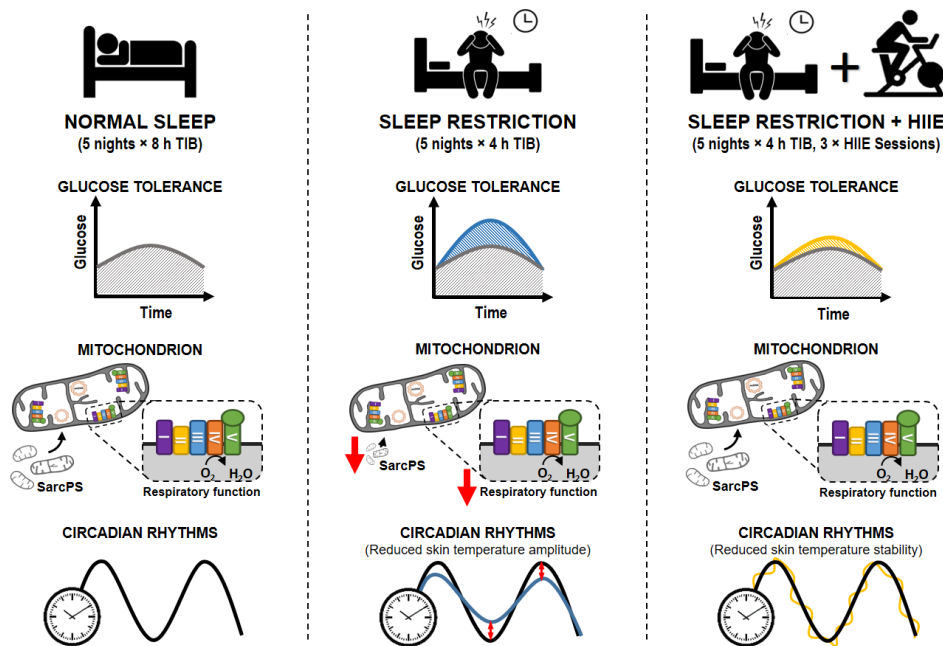

417

418 **Figure 6 – Summary of the effects of sleep restriction, with or without HIIE, on glucose**  
419 **tolerance, mitochondrial characteristics, and circadian rhythms.** NS – Normal Sleep group,  
420 SR – Sleep Restriction group, SR+EX – Sleep Restriction and Exercise group, HIIE – High-  
421 intensity interval exercise, SarcPS – Sarcoplasmic protein synthesis, TIB – Time in bed.

422

423

424 **Study methodology**

425 **Ethics approval**

426 All procedures involved conform to the standards set by the latest revision of the  
427 Declaration of Helsinki (except for registration in a database) and were approved by the  
428 Victoria University Human Research Ethics Committee (HRE15-294).

429

430 **Participants**

431 Twenty-four healthy, recreationally active men, aged between 18 and 40 years of age,  
432 volunteered to participate. Eligible participants 1) were not taking any medications, 2)  
433 were not performing shift-work (within the previous three months), 3) had regular  
434 sleeping habits (6 – 9 hours per night) and no previously diagnosed sleep disorders, 4)  
435 had not travelled overseas in the previous two months, and 5) had a body mass index  
436 between 19 and 30.

437

438 **Study overview**

439 Eligible participants attended the exercise physiology laboratory for baseline  
440 anthropometric measurements (i.e., height and body mass), and aerobic fitness testing  
441 (peak oxygen uptake [ $\dot{V}O_{2peak}$ ] and peak aerobic power [ $\dot{W}_{Peak}$ ]) that was performed to  
442 volitional exhaustion on an electronically braked cycle ergometer (Excalibur, V2.0; Lode,  
443 Groningen, Netherlands), using an incremental ramp protocol (30 W/minute). One week  
444 prior to the intervention, a resting skeletal muscle biopsy was obtained to determine  
445 baseline levels of deuterium oxide (D<sub>2</sub>O) enrichment, and to assess basal mitochondrial  
446 respiratory function. Following baseline testing, participants were matched for age, BMI,  
447 habitual sleep duration,  $\dot{V}O_{2peak}$ , and mitochondrial respiratory function, and then  
448 allocated to one of three experimental groups, in a counterbalanced order (Table 3).

449

450

451

452

453

454

455

456 **Table 3.** Baseline characteristics of participants

|                                                                                                         | NS<br>(n=8) | SR<br>(n=8) | SR+EX<br>(n=8) |
|---------------------------------------------------------------------------------------------------------|-------------|-------------|----------------|
| Age (y)                                                                                                 | 24 ± 4      | 25 ± 5      | 24 ± 4         |
| Height (cm)                                                                                             | 177 ± 8     | 179 ± 6     | 179 ± 7        |
| Mass (kg)                                                                                               | 78.7 ± 13.3 | 74.5 ± 11.7 | 80.2 ± 9.5     |
| BMI                                                                                                     | 25.2 ± 3.6  | 23.3 ± 3.0  | 24.6 ± 2.5     |
| $\dot{V}O_{2\text{peak}}$ (mL.kg <sup>-1</sup> .min <sup>-1</sup> )                                     | 43.7 ± 9.7  | 47.2 ± 6.7  | 48.0 ± 5.0     |
| $\dot{W}_{\text{peak}}$ (W)                                                                             | 319 ± 59    | 330 ± 44    | 362 ± 48       |
| Habitual sleep duration (h:min)                                                                         | 7:37 ± 0:45 | 7:08 ± 0:44 | 7:17 ± 0:39    |
| Mitochondrial respiration<br>(ETF+CI+CII) <sub>p</sub> (pmol.s <sup>-1</sup> .mg tissue <sup>-1</sup> ) | 80.8 ± 17.7 | 88.3 ± 25.6 | 81.2 ± 19.7    |

457 Values are mean ± SD. There were no significant differences between the three groups  
 458 for any of the baseline characteristics. NS – Normal sleep, SR – Sleep restriction, SR+EX  
 459 – Sleep Restriction and Exercise, BMI – body mass index,  $\dot{W}_{\text{peak}}$  – peak power (W),  
 460 (ETF+CI+CII)<sub>p</sub> – maximal oxidative phosphorylation through electron transferring  
 461 flavoprotein, complex 1 and complex 2 of the electron transport system (pre-study muscle  
 462 biopsy).

463

464 The study consisted of an eight-night stay within a temperature-controlled sleep  
 465 laboratory. All groups completed two initial nights of baseline sleep (8 h TIB from 23:00  
 466 h to 07:00 h), followed by a five-night intervention period, during which the NS group  
 467 spent 8 h TIB (23:00 h to 07:00 h), while both SR and SR+EX spent 4 h TIB per night  
 468 (03:00 h to 07:00 h). Between 23:00 h and 03:00 h, lighting was dimmed to below 15 lux  
 469 to reduce the effect of lighting on circadian rhythms (54). The SR+EX group also  
 470 performed three exercise sessions during the intervention period on days 4, 5, and 6 at  
 471 10:00 h. Following the intervention period, all groups completed a final night of *ad*  
 472 *libitum* recovery sleep. Participants were monitored throughout the protocol and provided  
 473 with a standardised diet consisting of fixed proportions (relative to body mass) of  
 474 carbohydrates (4.5 g.kg<sup>-1</sup>.d<sup>-1</sup>), protein (1.5 g.kg<sup>-1</sup>.d<sup>-1</sup>) and fat (1 g.kg<sup>-1</sup>.d<sup>-1</sup>). All mealtimes  
 475 (six throughout the day) were kept constant. An overview of the study protocol is shown  
 476 in Figure 7.

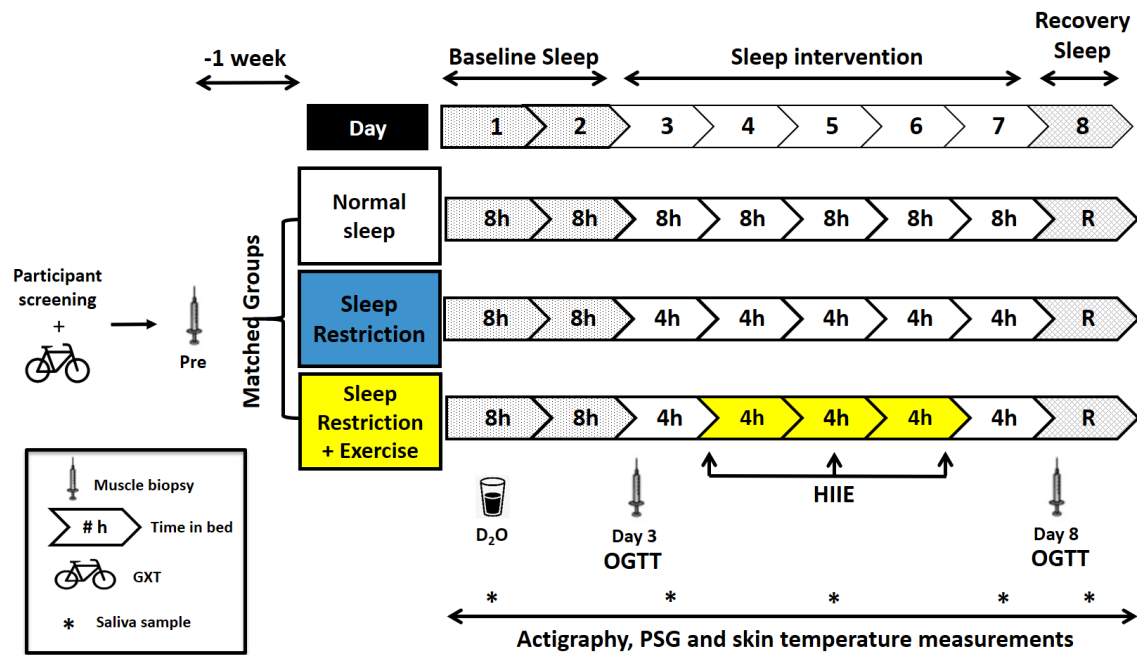

477

478 **Figure 7.** Schematic representation of the study protocol. OGTT – oral glucose tolerance  
 479 test, GXT – Graded exercise test, D<sub>2</sub>O – deuterium oxide ingestion, HIIE – high-intensity  
 480 interval exercise, R – *ad libitum* recovery sleep, PSG – polysomnography sleep  
 481 monitoring, participant screening refers to medical questionnaires, exclusion criteria and,  
 482 habitual sleep, and physical activity monitoring.

483

484

## 485 Experimental procedures

### 486 Sleep and physical activity monitoring

487 Sleep was assessed for one week prior to and then throughout the study using wrist-watch  
 488 activity devices (Actiwatch 2, Philips Respironics, Murrysville, PA, USA) (33). Sleep  
 489 architecture, duration, and quality were also determined via polysomnography (PSG)  
 490 (Compumedics, AUS) on night 6 for a subset of participants from each condition ( $n=12$ ;  
 491 4 per group). Electrode placement for PSG monitoring was determined using the 10-20  
 492 electrode placement system and scored in accordance to standard criteria (55). Habitual  
 493 daily step counts were monitored using validated step-counting applications on the  
 494 participants' personal mobile phone devices (i-Health app, Apple Inc., Cupertino, CA,  
 495 USA; and Samsung Health, Samsung Electronics Co., Ltd., Suwon, South Korea) and  
 496 these step counts were replicated throughout the study (Table 1) (data modified from  
 497 (56)).

498

499

500

501 **High-intensity interval exercise (HIIE)**

502 The HIIE protocol was adapted from previous studies, which demonstrated improvements  
503 in glucose tolerance (27, 57) and consisted of  $10 \times 60$ -second intervals performed on a  
504 cycle ergometer (Velotron, Racer-Mate, Seattle, WA, USA) at 90% of each participant's  
505  $\dot{W}_{\text{peak}}$ . Each interval was interspersed with 75 seconds of active recovery at 60 W. Each  
506 session started with a 3-minute warm up at 60 W. The mean power per interval was  $318$   
507  $\pm 53$  W and the mean HR throughout the protocol was  $156 \pm 13$  bpm.

508

509 **Wrist skin temperature measurements**

510 Wrist skin temperature was measured every 10 min (at a sensitivity of  $0.0625^{\circ}\text{C}$ ) across  
511 two 48 h periods (Pre-intervention - Days 2 and 3 (until 11 pm) and Post-intervention -  
512 Days 6 and 7), using non-invasive temperature recording devices (iButtons, ThermoChron  
513 iButton; Embedded Data Systems, Lawrenceburg, KY). This method has been shown to  
514 be reliable and valid for evaluating temperature circadian rhythmicity, with peripheral  
515 wrist skin temperature reported to have an inverse relationship to core body temperature  
516 (58, 59). The data was analysed as previously described (59), for variations in temperature  
517 amplitude and stability for each participant, using a modified version of the software  
518 program JTK\_CYCLE (60). Temperature amplitude is defined as the difference between  
519 the maximum (or minimum) value of the trace and the mesor (which represents the mean  
520 value of the data after smoothing with a cosine function) across a 24-h period (61);  
521 changes in amplitude having previously been proposed to provide an indication of the  
522 robustness of the rhythm (58, 62). The degree of phase homogeneity of a rhythm during  
523 the period of data collection is considered a description of the 'stability' of the rhythm  
524 (i.e., stability is considered high when the oscillatory pattern of the rhythm is nearly  
525 identical from one day to the next, and considered low when there are large discrepancies  
526 between oscillatory patterns from day-to-day) (58, 62). Data from eight participants in  
527 both the NS and SR groups were included; however, due to technical issues, data from  
528 the SR+EX group includes only six participants.

529

530 **Oral glucose tolerance testing (OGTT)**

531 To assess glucose tolerance, OGTT tests were performed on Day 3 (pre-intervention) and  
532 Day 8 (post-intervention) at 08:00 h, following an overnight fast. Participants consumed  
533 a 300 mL solution containing 75 g of glucose (Point of Care Diagnostics-Scientific, NSW,  
534 Australia) and blood samples were collected after 0, 10, 20, 30, 60, 90, and 120 minutes.

535 Plasma glucose concentrations were measured on a glucose/lactate analyser (YSI, 2300  
536 STAT plus, Yellow Spring, OH, USA). Plasma insulin concentrations were assessed  
537 using an Insulin ELISA kit (ALPCO. 80-INSHU-E01.1, E10.1, Salem, NH, USA) and  
538 run according to the manufacturer's instructions.

539

#### 540 **Muscle biopsies**

541 One week prior to commencing the study, and on Day 3 and Day 8 of the intervention,  
542 muscle biopsies were sampled from the *vastus lateralis* muscle using a suction-modified  
543 Bergström needle, and under local anaesthesia of the skin and fascia (1% lidocaine). All  
544 samples were collected at 10:00 h. Samples on Day 3 and 8 were collected post OGTT.  
545 All samples were immediately frozen in liquid nitrogen and stored at -80°C, or set aside  
546 for mitochondrial respirometry.

547

#### 548 **High-resolution respirometry**

549 Immediately following the muscle biopsies, muscle fibres were placed in ice-cold biopsy  
550 preserving solution (BioPS) and prepared as previously described (26). Mitochondrial  
551 respiration was measured in triplicate (coefficient of variation [CV] = 12%) (from 2 to 4  
552 mg wet weight of muscle fibers) in MiR05 at 37°C by using the high-resolution  
553 Oxygraph-2k (Oroboros, Innsbruck, Austria). Oxygen concentration (in nanomoles per  
554 milliliter) and flux (in picomoles per second per milligram) were recorded with DatLab  
555 software (Oroboros). The following substrate–uncoupler–inhibitor titration (SUIT)  
556 protocol was used to assess mitochondrial respiratory function; octanoyl-carnitine (0.2  
557 mM) and malate (2 mM) for leak respiration (L) via electron transferring flavoprotein  
558 (ETF), (ETF)L, ADP (5 mM, saturating concentration) was added for measurement of  
559 oxidative phosphorylation capacity (P), (ETF)P. Pyruvate (5 mM) was then added for  
560 measurement through Complex 1 (CI), (ETF+CI)P, followed by addition of succinate (10  
561 mM) for measurement of oxidative phosphorylation capacity through complex 1 and 2  
562 combined (ETF+CI+II)P. Cytochrome c (10 mM) was then added to test for outer  
563 mitochondrial membrane integrity (an oxygen flux increase of < 15% from (ETF+CI+II)P  
564 was considered acceptable). A series of stepwise carbonyl cyanide 4-(trifluoromethoxy)  
565 phenylhydrazone (FCCP) titrations (0.75–1.5 mM), for the measurement of ETS capacity  
566 (E) through (ETF+CI+II)E followed. Rotenone (0.5 mM), an inhibitor of CI, was then  
567 added to determine E through CII (ETF+CII)E, whereas addition of antimycin A (2.5  
568 mM), an inhibitor of CIII, allowed measurement of and correction for residual oxygen

569 consumption (ROX), which is indicative of non-mitochondrial oxygen consumption. As  
570 there was no difference in mitochondrial respiration between ‘Pre’ and Day 3 resting  
571 biopsies (mean (ETF+CI+II)P pmol O<sub>2</sub>.s<sup>-1</sup>.mg<sup>-1</sup> ± SD; Pre – 81.4 ± 21.6 pmol O<sub>2</sub>.s<sup>-1</sup>.mg<sup>-1</sup>,  
572 Day 3 - 80.6 ± 21.0 pmol O<sub>2</sub>.s<sup>-1</sup>.mg<sup>-1</sup>, *P*=0.831), ‘Baseline’ mitochondrial respiration  
573 was calculated as the mean from the ‘Pre’ study and Day 3 muscle biopsies.

574

#### 575 **Assessment of sarcoplasmic protein synthesis (SarcPS)**

576 SarcPS was used as an indicator of mitochondrial protein synthesis (MitoPS), as  
577 performed previously (24), due to the large amount of muscle needed to assess MitoPS  
578 (e.g., 80 – 100 mg). In validating this approach, we measured CS activity (a validated  
579 biomarker of mitochondrial content (16)) in whole-muscle lysate, as well as the  
580 myofibrillar and sarcoplasmic fractions (Figure 4a). The whole-muscle CS activity was  
581 significantly higher than the myofibrillar fraction (mean difference CS activity (mol/h/kg  
582 protein) ± SD, 1.30 ± 0.48, CI [0.64, 1.97], *P*<0.001). The sarcoplasmic fraction CS  
583 activity was also significantly higher than the myofibrillar fraction (2.05 ± 0.35, CI  
584 [-2.71, -1.39], *P*<0.001) and whole-muscle fractions (0.74 ± 0.44, CI [-1.40, -0.07],  
585 *P*=0.027) demonstrating that the sarcoplasmic fractions are enriched with mitochondria,  
586 compared to both the myofibrillar fraction and whole-muscle sample.

587

588 To determine SarcPS, on Day 1 each participant ingested 150 mL of Deuterium Oxide  
589 (D<sub>2</sub>O) (70 atom %, Cambridge Isotope Laboratories) as previously described (63). Saliva  
590 samples were collected prior to D<sub>2</sub>O ingestion and then on Days 3, 5, 7, and 8 to determine  
591 body water enrichment via cavity ring-down spectroscopy (Picarro L2130-I analyser,  
592 Picarro, Santa Clara, CA). Total body water <sup>2</sup>H enrichment was used as a surrogate for  
593 plasma alanine <sup>2</sup>H labelling, as previously described (63). The mean body water  
594 enrichment (atom percent excess, APE) has been reported previously (56).

595

596 Frozen muscle samples (40 to 60 mg) were homogenised and prepared as previously  
597 described (64). Cation exchange chromatography was then performed on the  
598 sarcoplasmic samples using columns containing Dowex resin (Dowex 50wx8-200 ion  
599 exchange resin, Sigma Aldrich) to extract free amino acids from the sarcoplasmic  
600 fractions (64). The amino acid samples were then derivatised as their N-acetyl-n-propyl-  
601 esters, as per previous protocols (65).



602

603 The  $^2\text{H}/^1\text{H}$  ratio of the sarcoplasmic samples were determined using gas chromatography  
604 pyrolysis isotope ratio mass spectrometry (GC-P-IMS) (Metabolic Solutions, Nashua,  
605 NH, USA), to assess the incorporation of deuterium into protein-bound alanine. This was  
606 used to assess the fractional synthetic rate (FSR) of sarcoplasmic proteins with the use of  
607 the enrichment of body water, corrected for the mean number of deuterium moieties  
608 incorporated per alanine (i.e., 3.7) as previously described (63), as the surrogate precursor  
609 labelling between subsequent biopsies.

610

611 The following standard equation (63) was used to determine FSR:

612

$$613 \quad \text{FSR (\%/day)} = ((E_{t1} - E_{t0}) / (E_p \times \text{time})) \times 100$$

614

615 Where; FSR = fractional synthetic rate,  $E_{t1}$  = APE day 8,  $E_{t0}$  = APE day 3,  $E_p$  = average  
616 saliva APE, time = time between biopsies, in days, and APE = atomic percentage excess.

617

#### 618 **Preparation of whole-muscle lysates for western blots and CS activity assay**

619 Frozen muscle (10 to 20 mg) was homogenised as previously described (26) in an ice-  
620 cold lysis buffer (1:20 w/v) containing 50 mM Tris, 150 mM NaCl, 1 mM EDTA, 1%  
621 IGEPAL, deionised water and a protease/phosphatase inhibitor cocktail (Cell Signaling  
622 Technology (CST), Danvers, MA, USA), adjusted to pH 7.4. Protein concentration was  
623 determined in triplicate with a commercial colorimetric assay (Protein Assay kit-II; Bio-  
624 Rad, Gladesville, NSW, Australia), against bovine serum albumin standards (BSA,  
625 A9647; Sigma-Aldrich).

626

#### 627 **Citrate synthase activity assay**

628 Citrate synthase (CS) activity was determined in triplicate on a 96-well microtiter plate  
629 by adding 7.5  $\mu\text{L}$  of a 4 mg/mL muscle homogenate (freeze thawed in liquid nitrogen  
630 twice), 40  $\mu\text{L}$  of 3 mM acetyl CoA, 25  $\mu\text{L}$  of 1 mM 5,5'-dithiobis(2-nitrobenzoic acid)  
631 (DTNB), 165  $\mu\text{L}$  of 100 mM Tris buffer (pH 8.3, kept at 30 °C). After addition of 15  $\mu\text{L}$   
632 of 10 mM oxaloacetic acid, the plate was immediately placed in an xMark-Microplate  
633 spectrophotometer (Bio-Rad) at 30°C, and after 30 s of linear agitation, absorbance at 412  
634 nm was recorded every 15 s for 3 min. CS activity is reported as moles per hour per  
635 kilogram of protein.

636

### 637 **Western blotting**

638 Muscle homogenate was diluted in 4X Laemmli buffer, and equal amounts of total protein  
639 (15 or 20 µg) were loaded in different wells on Criterion™ 4-20% TGX Stain-Free™  
640 Precast Gels (Bio-Rad, Australia). A stain-free system (Bio-Rad, Australia) was used as  
641 a loading control, with protein expression normalised to total protein loaded per lane.  
642 Each gel also contained four to six internal standards of varying dilutions, made from a  
643 mixed homogenate of every sample in equal concentrations. These standards were used  
644 to form a calibration curve, with density plotted against protein content. Protein  
645 abundance was then calculated from the measured band intensity for each sample on the  
646 gel, using the linear regression equation from the calibration curve.

647

648 Muscle lysates were separated via gel electrophoresis and transferred to PVDF  
649 membranes. Membranes were then blocked in 5% non-fat dry milk diluted in Tris-  
650 buffered saline with 0.1% Tween-20 (TBST) for 60 minutes. Membranes were then  
651 incubated overnight at 4°C with the appropriate primary antibody, prepared at a 1:1000  
652 dilution in TBST with 5% BSA and 0.02% sodium azide (unless stated otherwise). The  
653 following primary antibodies were from Cell Signaling Technologies (CST) and include  
654 PGC-1α (CST2178), DRP1 (CST5341), MFN2 (CST9482), p53 (CST2527), GLUT4  
655 (CST2213). The following antibodies were obtained from Abcam; BMAL1 (AB93806),  
656 Total OXPHOS (AB110413). The membranes were then incubated at room temperature  
657 with the appropriate host species-specific secondary antibody for 60 min, before being  
658 exposed to a chemiluminescence solution (Clarity™ Western ECL Substrate [Bio-Rad,  
659 Hercules, CA, USA] or SuperSignal™ West Femto Maximum Sensitivity Substrate  
660 [ThermoFisher, ThermoFischer Scientific, Wilmington, DE, USA]). Images were taken with  
661 a ChemiDoc Imaging System fitted (Bio-Rad). Densitometry was performed with Image  
662 Lab 5.0 software (Bio-Rad). Images are typically displayed with at least five bandwidths  
663 above and below the band of interest.

664

### 665 **Real-time quantitative polymerase chain reaction (qPCR)**

666 RNA extraction with TRIzol (Life Technologies, 15596 026) from frozen muscle samples  
667 (10 to 20 mg), quantification, and reverse transcription (iScript™ Reverse transcription  
668 supermix, BioRad) were performed as previously described (66). Relative mRNA  
669 expression was measured by qPCR (QuantStudio 7 Flex, Applied Biosystems, Foster

670 City, CA) using SsoAdvanced Universal SYBR Green Supermix (Bio-Rad). Primers were  
671 designed using Primer-BLAST to include all splice variants, and were purchased from  
672 Sigma-Aldrich (Supplementary Table 4). The expression of each target gene was  
673 normalised to the geometric mean of expression of the three most stably expressed  
674 reference genes (as previously described) (66), and using the  $2^{-\Delta\Delta C_t}$  method (where  $C_t$  is  
675 the quantification cycle). Due to insufficient muscle sample collections for 1 participant,  
676 only samples from 7 participants in the NS group were prepared for RT-PCR.

677

### 678 **Statistical analysis**

679 Statistical analyses were conducted using the statistical software package GraphPad  
680 Prism (V7.03). Pre- to post-intervention changes in gene expression, protein content,  
681 mitochondrial respiratory function, peripheral skin temperature, glucose tolerance, citrate  
682 synthase activity, and plasma insulin concentrations were assessed for each group using  
683 a mixed analysis of variance (ANOVA) with one between-subjects measure (group) and  
684 a within-subjects measure (time). Significant effects of interaction (group  $\times$  time), time  
685 (pre vs post), and group (NS vs SR vs SR+EX) are reported where effects are seen. Where  
686 significant effects occurred, Bonferonni post-hoc testing was performed to locate the  
687 differences. All statistical analyses of gene expression and protein content data were  
688 conducted using raw values. Gene expression data in-text are reported as percent fold-  
689 changes from pre-intervention values (mean %  $\pm$  SD) with 95% confidence intervals (CI)  
690 from fold-change data (as a percentage), with the  $P$  value from the raw data reported.  
691 Data in figures represent fold-changes from pre-intervention values, with individual  
692 responses. A one-way ANOVA was used to assess differences between groups for the  
693 mean actigraphy sleep data and SarcPS data. All data in text, figures and tables are  
694 presented as mean  $\pm$  standard deviation (SD), and 95% confidence intervals with  $P$  values  
695  $\leq 0.05$  indicating statistical significance. Exact  $P$  values are presented, unless  $P < 0.001$   
696 or  $> 0.999$ .

- 697 1. Anothaisintawee T, Reutrakul S, Van Cauter E, Thakkinstian A. Sleep disturbances compared  
698 to traditional risk factors for diabetes development: Systematic review and meta-analysis. *Sleep Med*  
699 *Rev.* 2015;30:11-24.
- 700 2. Rao MN, Neylan TC, Grunfeld C, Mulligan K, Schambelan M, Schwarz JM. Subchronic sleep  
701 restriction causes tissue-specific insulin resistance. *J Clin Endocrinol Metab.* 2015;100(4):1664-71.
- 702 3. Buxton OM, Pavlova M, Reid EW, Wang W, Simonson DC, Adler GK. Sleep restriction for 1  
703 week reduces insulin sensitivity in healthy men. *Diabetes.* 2010;59(9):2126-33.
- 704 4. Reynolds AC, Dorrian J, Liu PY, Van Dongen HP, Wittert GA, Harmer LJ, et al. Impact of five  
705 nights of sleep restriction on glucose metabolism, leptin and testosterone in young adult men. *PLoS*  
706 *One.* 2012;7(7):e41218.

- 707 5. Spiegel K, Leproult R, Van Cauter E. Impact of sleep debt on metabolic and endocrine function.  
708 *Lancet*. 1999;354(9188):1435-9.
- 709 6. Donga E, van Dijk M, van Dijk JG, Biermasz NR, Lammers GJ, van Kralingen KW, et al. A  
710 single night of partial sleep deprivation induces insulin resistance in multiple metabolic pathways in  
711 healthy subjects. *J Clin Endocrinol Metab*. 2010;95(6):2963-8.
- 712 7. Cedernaes J, Osler ME, Voisin S, Broman JE, Vogel H, Dickson SL, et al. Acute sleep loss  
713 induces tissue-specific epigenetic and transcriptional alterations to circadian clock genes in men. *J Clin*  
714 *Endocrinol Metab*. 2015:JC20152284.
- 715 8. Cedernaes J, Schonke M, Westholm JO, Mi J, Chibalin A, Voisin S, et al. Acute sleep loss  
716 results in tissue-specific alterations in genome-wide DNA methylation state and metabolic fuel  
717 utilization in humans. *Sci Adv*. 2018;4(8):eaar8590.
- 718 9. van den Berg R, Mook-Kanamori DO, Donga E, van Dijk M, van Dijk JG, Lammers GJ, et al.  
719 A single night of sleep curtailment increases plasma acylcarnitines: Novel insights in the relationship  
720 between sleep and insulin resistance. *Arch Biochem Biophys*. 2016;589:145-51.
- 721 10. Hillman D, Mitchell S, Streatfeild J, Burns C, Bruck D, Pezzullo L. The economic cost of  
722 inadequate sleep. *Sleep*. 2018;41(8).
- 723 11. Ford ES, Cunningham TJ, Croft JB. Trends in Self-Reported Sleep Duration among US Adults  
724 from 1985 to 2012. *Sleep*. 2015;38(5):829-32.
- 725 12. Luxton DD, Greenburg D, Ryan J, Niven A, Wheeler G, Mysliwiec V. Prevalence and impact  
726 of short sleep duration in redeployed OIF soldiers. *Sleep*. 2011;34(9):1189-95.
- 727 13. Akerstedt T, Wright KP, Jr. Sleep Loss and Fatigue in Shift Work and Shift Work Disorder.  
728 *Sleep Med Clin*. 2009;4(2):257-71.
- 729 14. Kelley DE, He J, Menshikova EV, Ritov VB. Dysfunction of mitochondria in human skeletal  
730 muscle in type 2 diabetes. *Diabetes*. 2002;51(10):2944-50.
- 731 15. Mogensen M, Sahlin K, Fernstrom M, Glintborg D, Vind BF, Beck-Nielsen H, et al.  
732 Mitochondrial respiration is decreased in skeletal muscle of patients with type 2 diabetes. *Diabetes*.  
733 2007;56(6):1592-9.
- 734 16. Larsen S, Nielsen J, Hansen CN, Nielsen LB, Wibrand F, Stride N, et al. Biomarkers of  
735 mitochondrial content in skeletal muscle of healthy young human subjects. *J Physiol*.  
736 2012;590(14):3349-60.
- 737 17. Saner NJ, Bishop DJ, Bartlett JD. Is exercise a viable therapeutic intervention to mitigate  
738 mitochondrial dysfunction and insulin resistance induced by sleep loss? *Sleep Med Rev*. 2018;37:60-8.
- 739 18. Vondra K, Brodan V, Bass A, Kuhn E, Teisinger J, Andel M, et al. Effects of Sleep-Deprivation  
740 on the Activity of Selected Metabolic Enzymes in Skeletal-Muscle. *Eur J Appl Physiol O*.  
741 1981;47(1):41-6.
- 742 19. Bunger MK, Wilsbacher LD, Moran SM, Clendenin C, Radcliffe LA, Hogenesch JB, et al.  
743 *Mop3* is an essential component of the master circadian pacemaker in mammals. *Cell*.  
744 2000;103(7):1009-17.
- 745 20. Pastore S, Hood DA. Endurance training ameliorates the metabolic and performance  
746 characteristics of circadian Clock mutant mice. *J Appl Physiol (1985)*. 2013;114(8):1076-84.
- 747 21. Andrews JL, Zhang X, McCarthy JJ, McDearmon EL, Hornberger TA, Russell B, et al.  
748 *CLOCK* and *BMAL1* regulate *MyoD* and are necessary for maintenance of skeletal muscle phenotype  
749 and function. *Proc Natl Acad Sci U S A*. 2010;107(44):19090-5.
- 750 22. Richter EA, Hargreaves M. Exercise, GLUT4, and skeletal muscle glucose uptake. *Physiol Rev*.  
751 2013;93(3):993-1017.
- 752 23. Bishop DJ, Botella J, Genders AJ, Lee MJ, Saner NJ, Kuang J, et al. High-Intensity Exercise  
753 and Mitochondrial Biogenesis: Current Controversies and Future Research Directions. *Physiology*  
754 (Bethesda). 2019;34(1):56-70.
- 755 24. Bell KE, Seguin C, Parise G, Baker SK, Phillips SM. Day-to-Day Changes in Muscle Protein  
756 Synthesis in Recovery From Resistance, Aerobic, and High-Intensity Interval Exercise in Older Men. *J*  
757 *Gerontol A Biol Sci Med Sci*. 2015;70(8):1024-9.
- 758 25. Holloszy JO. Biochemical adaptations in muscle. Effects of exercise on mitochondrial oxygen  
759 uptake and respiratory enzyme activity in skeletal muscle. *J Biol Chem*. 1967;242(9):2278-82.
- 760 26. Granata C, Oliveira RS, Little JP, Renner K, Bishop DJ. Training intensity modulates changes  
761 in PGC-1 $\alpha$  and p53 protein content and mitochondrial respiration, but not markers of mitochondrial

- 762 content in human skeletal muscle. *FASEB journal : official publication of the Federation of American*  
763 *Societies for Experimental Biology*. 2016;30(2):959-70.
- 764 27. Little JP, Gillen JB, Percival ME, Safdar A, Tarnopolsky MA, Punthakee Z, et al. Low-volume  
765 high-intensity interval training reduces hyperglycemia and increases muscle mitochondrial capacity in  
766 patients with type 2 diabetes. *J Appl Physiol* (1985). 2011;111(6):1554-60.
- 767 28. Depner CM, Melanson EL, Eckel RH, Snell-Bergeon JK, Perreault L, Bergman BC, et al. Ad  
768 libitum Weekend Recovery Sleep Fails to Prevent Metabolic Dysregulation during a Repeating Pattern  
769 of Insufficient Sleep and Weekend Recovery Sleep. *Curr Biol*. 2019;29(6):957-67 e4.
- 770 29. Eckel RH, Depner CM, Perreault L, Markwald RR, Smith MR, McHill AW, et al. Morning  
771 Circadian Misalignment during Short Sleep Duration Impacts Insulin Sensitivity. *Curr Biol*.  
772 2015;25(22):3004-10.
- 773 30. Broussard JL, Wroblewski K, Kilkus JM, Tasali E. Two Nights of Recovery Sleep Reverses  
774 the Effects of Short-term Sleep Restriction on Diabetes Risk. *Diabetes Care*. 2016;39(3):e40-1.
- 775 31. Wolff G, Esser KA. Scheduled exercise phase shifts the circadian clock in skeletal muscle. *Med*  
776 *Sci Sports Exerc*. 2012;44(9):1663-70.
- 777 32. Zambon AC, McDearmon EL, Salomonis N, Vranizan KM, Johansen KL, Adey D, et al. Time-  
778 and exercise-dependent gene regulation in human skeletal muscle. *Genome Biol*. 2003;4(10):R61.
- 779 33. Stone KL, & Ancoli-Israel, S. Actigraphy. In: Kryger MH, Roth T, Dement WC, editors.  
780 *Principles and practice of sleep medicine*. 6th edition ed: Elsevier; 2016. p. 1671-8.
- 781 34. Carskadon MA, & Dement, W. C. Normal Human Sleep. In: Kryger MH, Roth T, Dement WC,  
782 editors. *Principles and practice of sleep medicine*. 6th edition ed: Elsevier; 2016. p. 15-24.
- 783 35. Miller BF, Hamilton KL. A perspective on the determination of mitochondrial biogenesis. *Am*  
784 *J Physiol Endocrinol Metab*. 2012;302(5):E496-9.
- 785 36. Sweeney EL, Peart DJ, Kyza I, Harkes T, Ellis JG, Walshe IH. Impaired Insulin Profiles  
786 Following a Single Night of Sleep Restriction: The Impact of Acute Sprint Interval Exercise. *Int J Sport*  
787 *Nutr Exerc Metab*. 2019:1-6.
- 788 37. de Souza JFT, Dattilo M, de Mello MT, Tufik S, Antunes HKM. High-Intensity Interval  
789 Training Attenuates Insulin Resistance Induced by Sleep Deprivation in Healthy Males. *Front Physiol*.  
790 2017;8:992.
- 791 38. Kranjic GN, Cameron-Smith D, Hargreaves M. Effect of short-term training on GLUT-4  
792 mRNA and protein expression in human skeletal muscle. *Exp Physiol*. 2004;89(5):559-63.
- 793 39. Kahn BB, Rossetti L, Lodish HF, Charron MJ. Decreased in vivo glucose uptake but normal  
794 expression of GLUT1 and GLUT4 in skeletal muscle of diabetic rats. *J Clin Invest*. 1991;87(6):2197-  
795 206.
- 796 40. Broussard JL, Ehrmann DA, Van Cauter E, Tasali E, Brady MJ. Impaired insulin signaling in  
797 human adipocytes after experimental sleep restriction: a randomized, crossover study. *Ann Intern Med*.  
798 2012;157(8):549-57.
- 799 41. Sweeney EL, Jeromson S, Hamilton DL, Brooks NE, Walshe IH. Skeletal muscle insulin  
800 signaling and whole-body glucose metabolism following acute sleep restriction in healthy males.  
801 *Physiol Rep*. 2017;5(23).
- 802 42. MacInnis MJ, Zacharewicz E, Martin BJ, Haikalis ME, Skelly LE, Tarnopolsky MA, et al.  
803 Superior mitochondrial adaptations in human skeletal muscle after interval compared to continuous  
804 single-leg cycling matched for total work. *J Physiol*. 2017;595(9):2955-68.
- 805 43. Groennebaek T, Jespersen NR, Jakobsgaard JE, Sieljacks P, Wang J, Rindom E, et al. Skeletal  
806 Muscle Mitochondrial Protein Synthesis and Respiration Increase With Low-Load Blood Flow  
807 Restricted as Well as High-Load Resistance Training. *Front Physiol*. 2018;9:1796.
- 808 44. Scalzo RL, Peltonen GL, Binns SE, Shankaran M, Giordano GR, Hartley DA, et al. Greater  
809 muscle protein synthesis and mitochondrial biogenesis in males compared with females during sprint  
810 interval training. *FASEB J*. 2014;28(6):2705-14.
- 811 45. Miller BF, Olesen JL, Hansen M, Dossing S, Cramer RM, Welling RJ, et al. Coordinated  
812 collagen and muscle protein synthesis in human patella tendon and quadriceps muscle after exercise. *J*  
813 *Physiol*. 2005;567(Pt 3):1021-33.
- 814 46. Trewin AJ, Berry BJ, Wojtovich AP. Exercise and Mitochondrial Dynamics: Keeping in Shape  
815 with ROS and AMPK. *Antioxidants (Basel)*. 2018;7(1).

- 816 47. Fealy CE, Mulya A, Lai N, Kirwan JP. Exercise training decreases activation of the  
817 mitochondrial fission protein dynamin-related protein-1 in insulin-resistant human skeletal muscle. *J*  
818 *Appl Physiol* (1985). 2014;117(3):239-45.
- 819 48. Cartoni R, Leger B, Hock MB, Praz M, Crettenand A, Pich S, et al. Mitofusins 1/2 and  
820 ERRalpha expression are increased in human skeletal muscle after physical exercise. *J Physiol*.  
821 2005;567(Pt 1):349-58.
- 822 49. van Moorsel D, Hansen J, Havekes B, Scheer FAJL, Jørgensen JA, Hoeks J, et al.  
823 Demonstration of a day-night rhythm in human skeletal muscle oxidative capacity. *Molecular*  
824 *Metabolism*. 2016;5(8):635-45.
- 825 50. de Goede P, Wefers J, Brombacher EC, Schrauwen P, Kalsbeek A. Circadian rhythms in  
826 mitochondrial respiration. *J Mol Endocrinol*. 2018;60(3):R115-R30.
- 827 51. Moller-Levet CS, Archer SN, Bucca G, Laing EE, Slak A, Kabiljo R, et al. Effects of  
828 insufficient sleep on circadian rhythmicity and expression amplitude of the human blood transcriptome.  
829 *Proc Natl Acad Sci U S A*. 2013;110(12):E1132-41.
- 830 52. Harfmann BD, Schroder EA, Kachman MT, Hodge BA, Zhang X, Esser KA. Muscle-specific  
831 loss of Bmal1 leads to disrupted tissue glucose metabolism and systemic glucose homeostasis. *Skelet*  
832 *Muscle*. 2016;6:12.
- 833 53. Kemler D, Wolff CA, Esser KA. Time of Day Dependent Effects of Contractile Activity on the  
834 Phase of the Skeletal Muscle Clock. *bioRxiv*. 2020:2020.03.05.978759.
- 835 54. Boivin DB, Duffy JF, Kronauer RE, Czeisler CA. Dose-response relationships for resetting of  
836 human circadian clock by light. *Nature*. 1996;379(6565):540-2.
- 837 55. Iber CA-I, S. Chesson, A. Quan, SF. . The AASM Manual for the Scoring of Sleep and  
838 Associated Events: Rules, Terminology and Technical Specifications: American Academy of Sleep  
839 Medicine; 2007.
- 840 56. Saner NJ, Lee MJ, Pitchford NW, Kuang J, Roach GD, Garnham A, et al. The effect of sleep  
841 restriction, with or without high-intensity interval exercise, on myofibrillar protein synthesis in healthy  
842 young men. *J Physiol*. 2020.
- 843 57. Little JP, Safdar A, Wilkin GP, Tarnopolsky MA, Gibala MJ. A practical model of low-volume  
844 high-intensity interval training induces mitochondrial biogenesis in human skeletal muscle: potential  
845 mechanisms. *J Physiol-London*. 2010;588(6):1011-22.
- 846 58. Sarabia JA, Rol MA, Mendiola P, Madrid JA. Circadian rhythm of wrist temperature in normal-  
847 living subjects A candidate of new index of the circadian system. *Physiol Behav*. 2008;95(4):570-80.
- 848 59. Tranel HR, Schroder EA, England J, Black WS, Bush H, Hughes ME, et al. Physical activity,  
849 and not fat mass is a primary predictor of circadian parameters in young men. *Chronobiol Int*.  
850 2015;32(6):832-41.
- 851 60. Hughes ME, Hogenesch JB, Kornacker K. JTK\_CYCLE: an efficient nonparametric algorithm  
852 for detecting rhythmic components in genome-scale data sets. *J Biol Rhythms*. 2010;25(5):372-80.
- 853 61. Corbalan-Tutau MD, Madrid JA, Ordovas JM, Smith CE, Nicolas F, Garaulet M. Differences  
854 in daily rhythms of wrist temperature between obese and normal-weight women: associations with  
855 metabolic syndrome features. *Chronobiol Int*. 2011;28(5):425-33.
- 856 62. Harfmann BD, Schroder EA, England JH, Senn NJ, Westgate PM, Esser KA, et al. Temperature  
857 as a Circadian Marker in Older Human Subjects: Relationship to Metabolic Syndrome and Diabetes. *J*  
858 *Endocr Soc*. 2017;1(7):843-51.
- 859 63. Wilkinson DJ, Franchi MV, Brook MS, Narici MV, Williams JP, Mitchell WK, et al. A  
860 validation of the application of D(2)O stable isotope tracer techniques for monitoring day-to-day  
861 changes in muscle protein subfraction synthesis in humans. *Am J Physiol Endocrinol Metab*.  
862 2014;306(5):E571-9.
- 863 64. Burd NA, West DW, Staples AW, Atherton PJ, Baker JM, Moore DR, et al. Low-load high  
864 volume resistance exercise stimulates muscle protein synthesis more than high-load low volume  
865 resistance exercise in young men. *PLoS One*. 2010;5(8):e12033.
- 866 65. McGlory C, von Allmen MT, Stokes T, Morton RW, Hector AJ, Lago BA, et al. Failed  
867 Recovery of Glycemic Control and Myofibrillar Protein Synthesis With 2 wk of Physical Inactivity in  
868 Overweight, Prediabetic Older Adults. *J Gerontol A Biol Sci Med Sci*. 2018;73(8):1070-7.

869 66. Kuang J, Yan X, Genders AJ, Granata C, Bishop DJ. An overview of technical considerations  
870 when using quantitative real-time PCR analysis of gene expression in human exercise research. PLoS  
871 One. 2018;13(5):e0196438.

872

873 **Additional information:**

874

875 **Competing interests** - The authors have no competing interests to declare.

876

877 **Author contributions** - NS, GR, SP, DB and JB were involved in the conception and design  
878 of the work, NS, ML, NP, AG, TS, JK, KE, ES, SP, DB and JB were involved in the acquisition,  
879 analysis or interpretation of the data for the work. NS, ML, NP, AG, GR, TS, JK, KE, ES, SP,  
880 DB and JB were involved in drafting the work and revising it critically for important  
881 intellectual content. All authors approved the final version of the manuscript. All authors agree  
882 to be accountable for all aspects of the work in ensuring that questions related to the accuracy  
883 or integrity of any part of the work are appropriately investigated and resolved. All persons  
884 designated as authors qualify for authorship, and all those who qualify for authorship are listed.

885

886 **Funding:**

887 This publication was supported in part by a Sports Medicine Australia (SMA) Research  
888 Foundation Grant and Australian Postgraduate Award PhD Scholarship to NS. SMP gratefully  
889 acknowledges support from the Canada Research Chairs program and funding for this work  
890 provided by the National Science and Engineering Research Council (NSERC) of Canada. TS  
891 was supported an NSERC of Canada graduate scholarship.

892

893 **Acknowledgements:**

894 We would like to thank all participants for their willingness to be involved with this study. We  
895 acknowledge the assistance of Dwight Marinkovic during data collection and Conor  
896 Verbruggen and Dr. Chris McGlory throughout the analysis process.
